# Supplementary material for: Water-assisted proton conductivity of two lanthanide-based supramolecules
Source: Royal Society of Chemistry journal article supplement (doi:10.1039/d1nj02397g), 2021-01-01
Supplement: d1nj02397g1.pdf [file d1nj02397g1.pdf]

## Water-assisted proton conductivity of two lanthanide supramolecules

Chen-Yu Mu, Zhi-Xiong Tao, Hong-Wei Wang, Miao Xue, Qing-Xu Wang, and Gang Li\*

College of Chemistry and Green Catalysis Centre, Zhengzhou University, Zhengzhou 450001,  
Henan, China.

### Supporting information

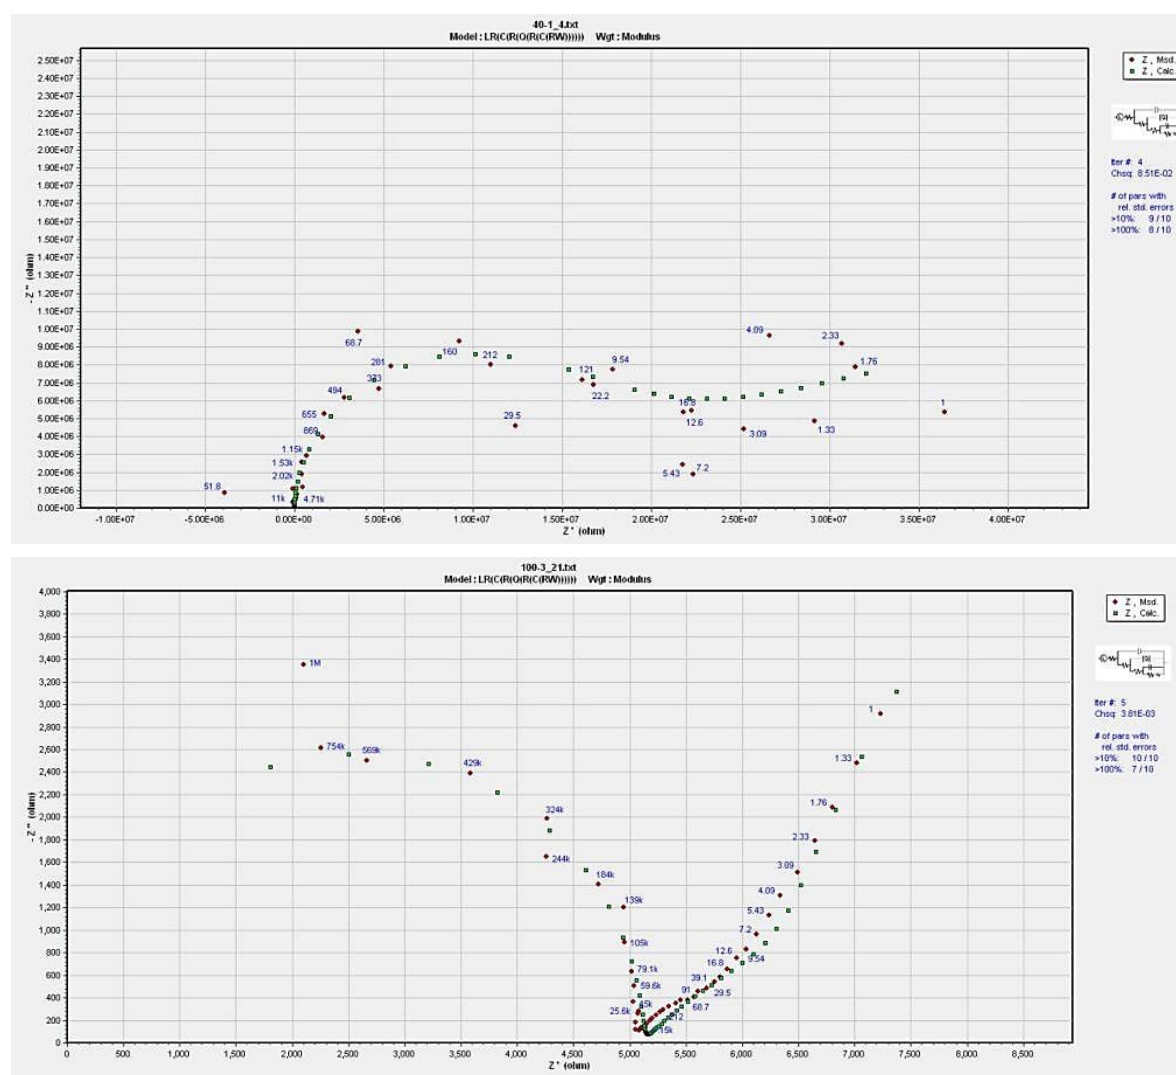

Fig. S1 Nyquist curves (red) and analog equivalent circuit curves (green) of complex 1 at 40 or 100 °C at 98% RH.

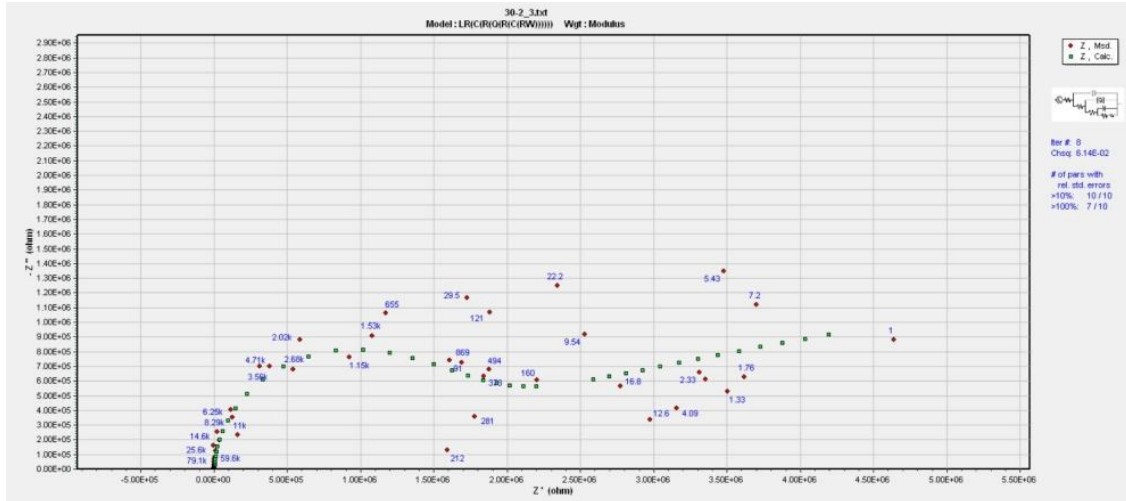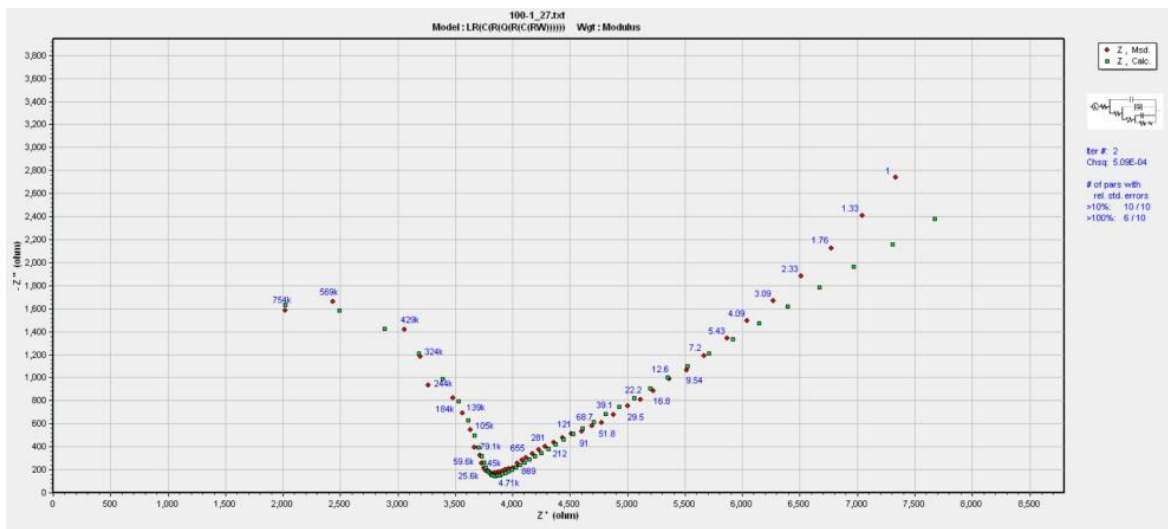

Fig. S2 Nyquist curves (red) and analog equivalent circuit curves (green) of complex 2 at 30 or 100 °C at 98% RH.

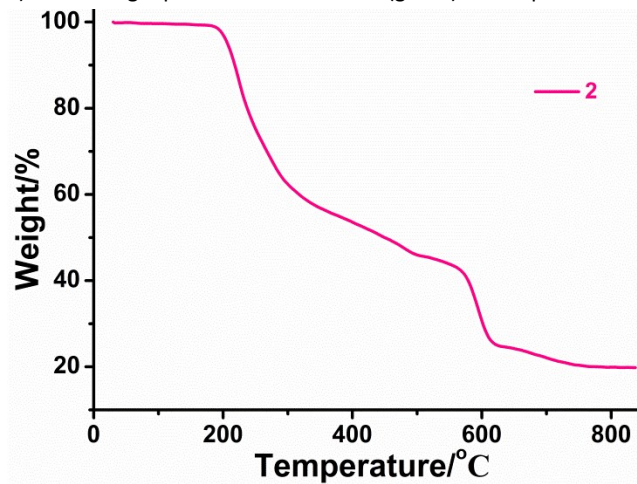

Fig. S3 TG curve of complex 2.

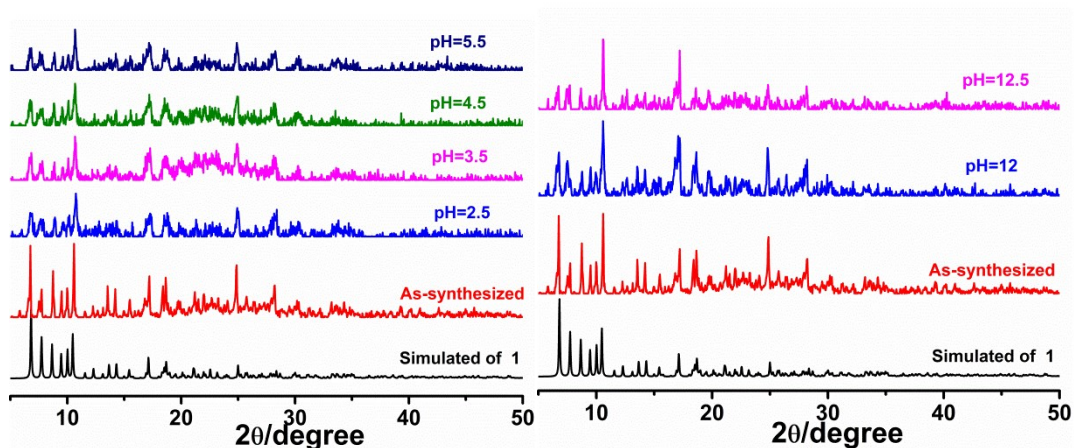

Fig. S4 XRD patterns of 1: before and after soaking in acidic solution (left); (b) before and after soaking in basic solution (right).

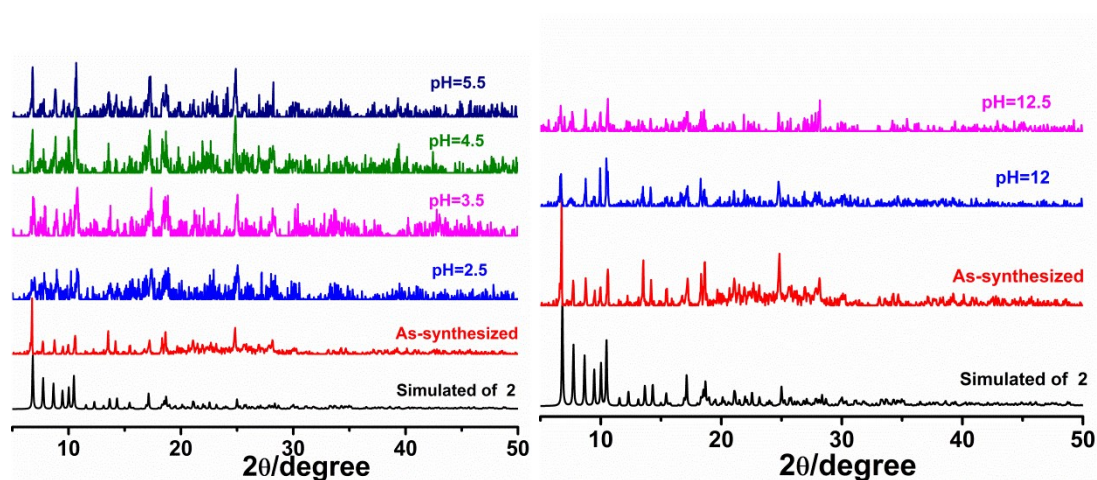

Fig. S5 XRD patterns of 2: before and after soaking in acidic solution (left); (b) before and after soaking in basic solution (right).

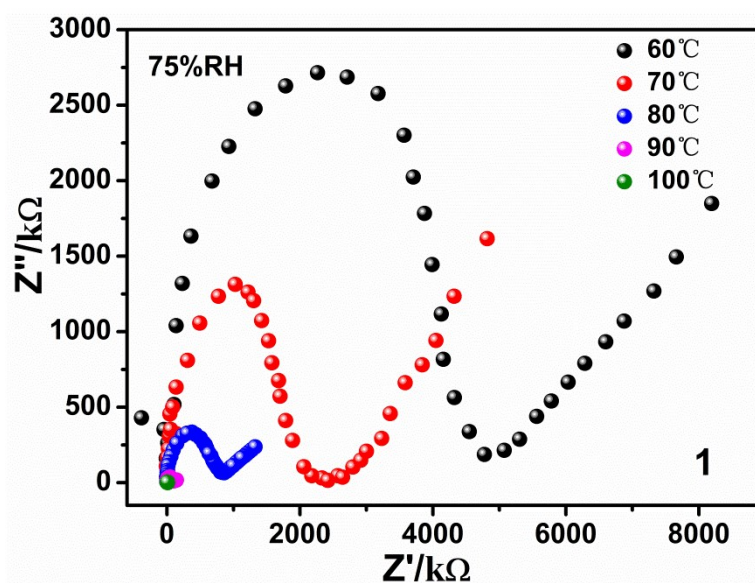

Fig. S6 Nyquist plots of 1 at 75% RH at different temperatures.



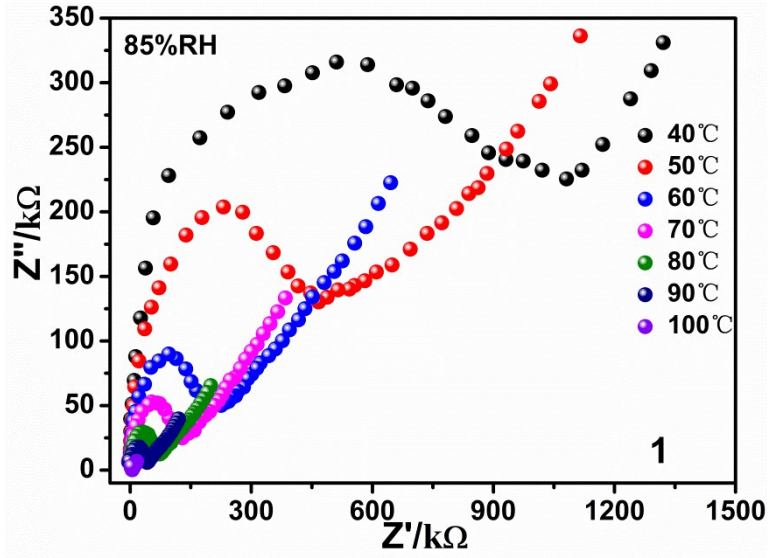

Fig. S7 Nyquist plots of 1 at 85% RH at different temperatures.

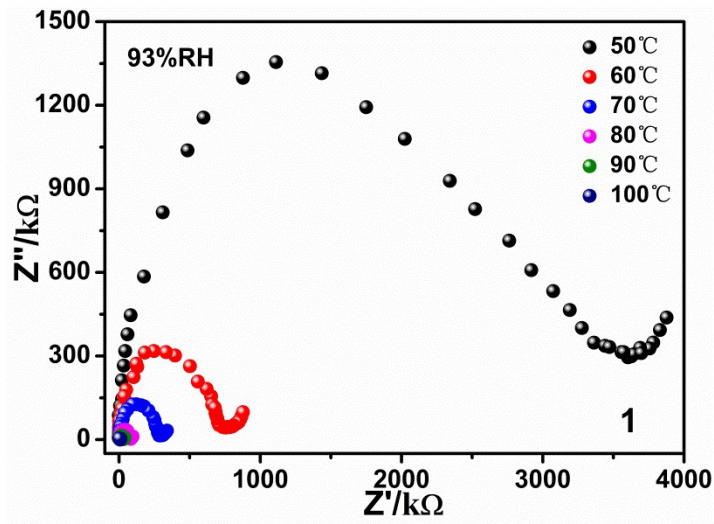

Fig. S8 Nyquist plots of 1 at 93% RH at different temperatures.

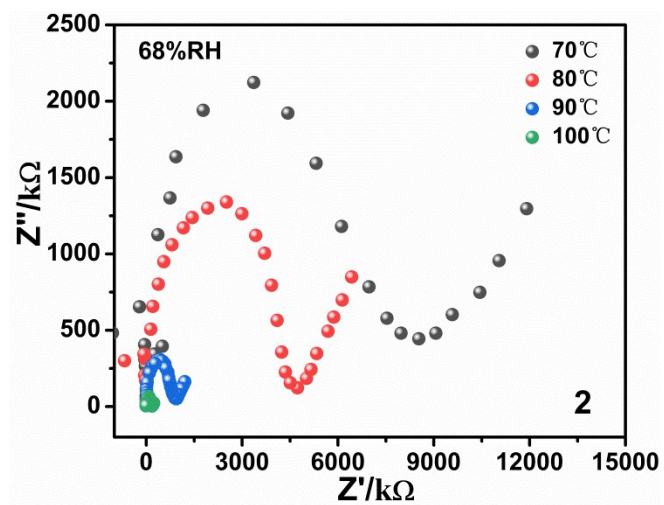

Fig. S9 Nyquist plots of 2 at 68% RH at different temperatures.

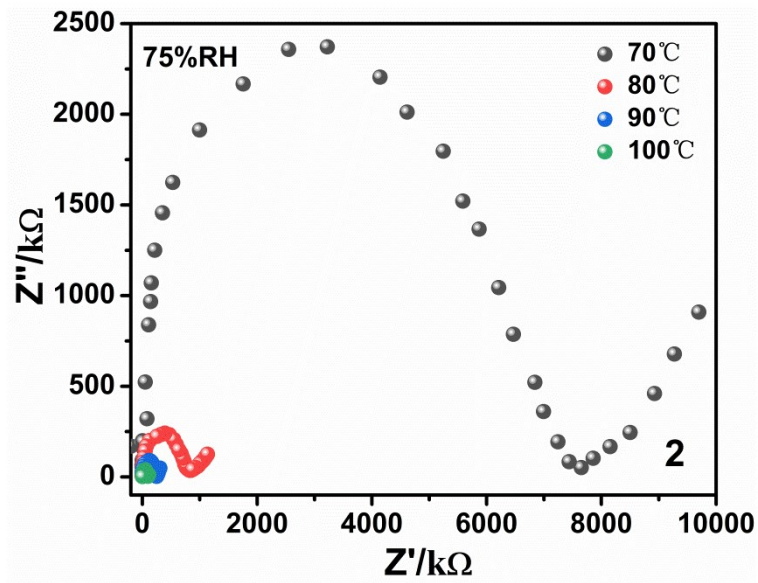

Fig. S10 Nyquist plots of **2** at 75% RH at different temperatures.

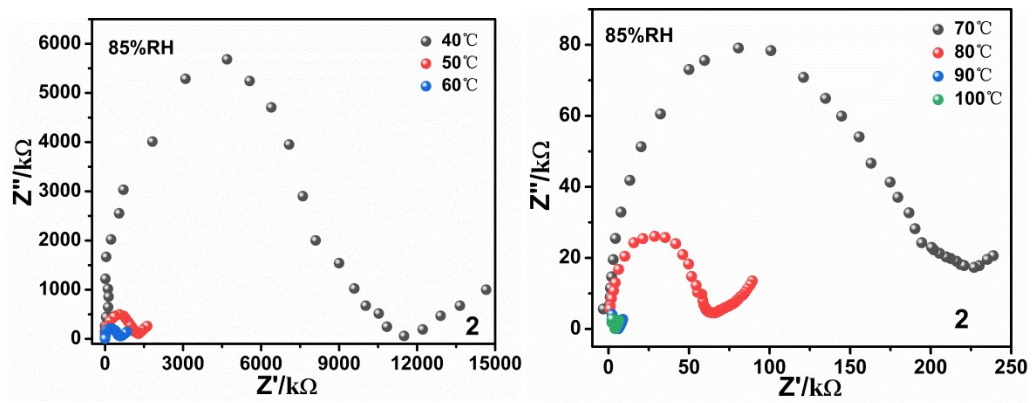

Fig. S11 Nyquist plots of **2** at 85% RHs at different temperatures.

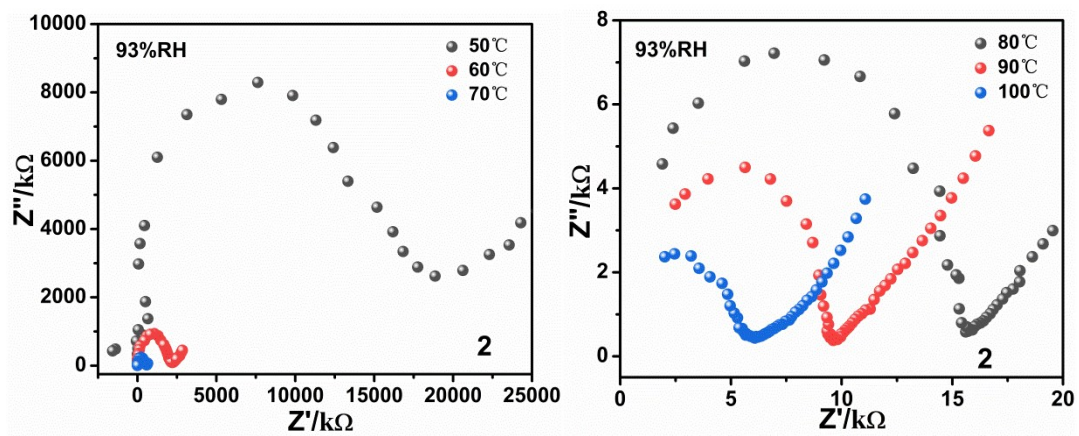

Fig. S12 Nyquist plots of **2** at different temperatures and at 93% RH.

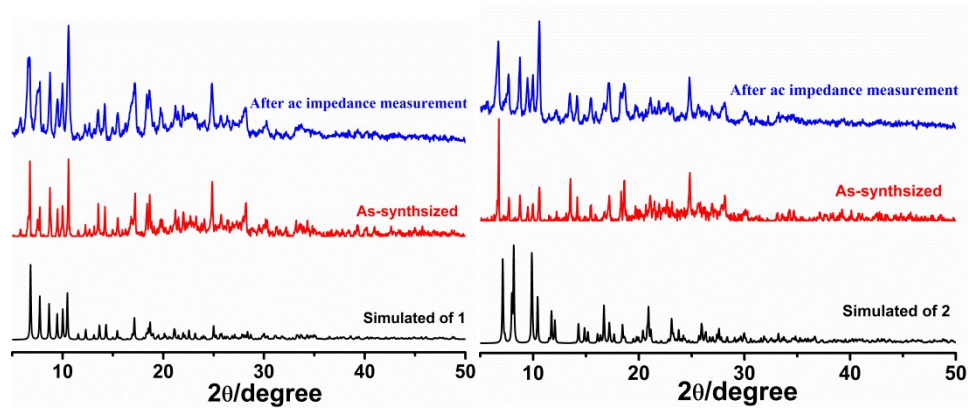

Fig. S13 PXRD patterns of **1** and **2** before and after electrochemical determinations.

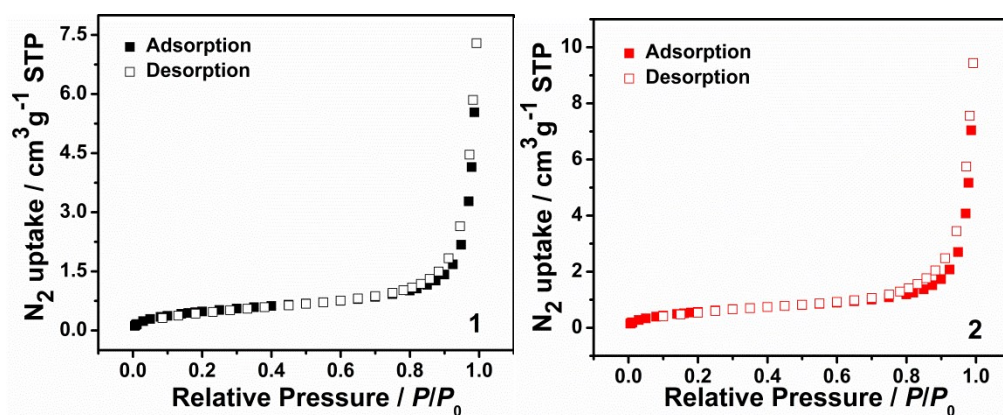

Fig. S14  $N_2$  adsorption/desorption curves of complex **1** and **2** at 77 K.

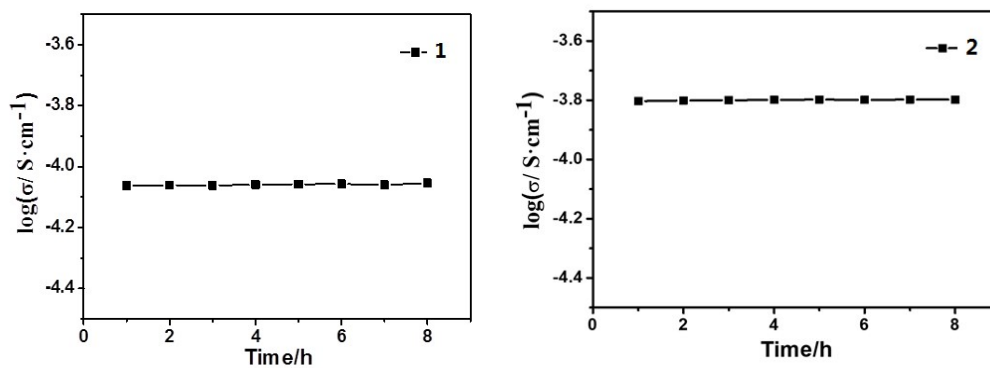

Fig. S15 Time-dependence of **1** and **2** at 98% RH and 100°C.

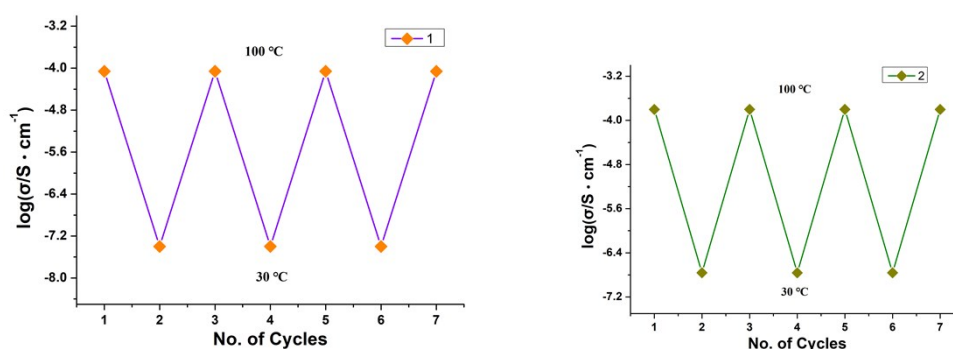

Fig. S16 Recyclability of 1 and 2 at 30 and 100 °C and 98% RH.

Table S1 The  $\sigma$  values ( $\text{S}\cdot\text{cm}^{-1}$ ) of 1 under various RHs and temperatures

|                    | 98%RH <sup>a</sup>    | 93%RH <sup>a</sup>    | 85%RH <sup>a</sup>    | 75%RH <sup>a</sup>    |
|--------------------|-----------------------|-----------------------|-----------------------|-----------------------|
| 30°C <sup>b</sup>  | $4.00 \times 10^{-8}$ |                       |                       |                       |
| 40°C <sup>b</sup>  | $2.47 \times 10^{-8}$ | $1.62 \times 10^{-7}$ |                       |                       |
| 50°C <sup>b</sup>  | $1.30 \times 10^{-7}$ | $5.71 \times 10^{-7}$ | $1.04 \times 10^{-6}$ | $5.20 \times 10^{-8}$ |
| 60°C <sup>b</sup>  | $4.16 \times 10^{-7}$ | $6.50 \times 10^{-7}$ | $2.47 \times 10^{-6}$ | $1.04 \times 10^{-7}$ |
| 70°C <sup>b</sup>  | $1.40 \times 10^{-6}$ | $1.68 \times 10^{-6}$ | $4.00 \times 10^{-6}$ | $2.26 \times 10^{-7}$ |
| 80°C <sup>b</sup>  | $5.77 \times 10^{-6}$ | $6.50 \times 10^{-6}$ | $7.42 \times 10^{-6}$ | $6.50 \times 10^{-7}$ |
| 90°C <sup>b</sup>  | $2.17 \times 10^{-5}$ | $3.46 \times 10^{-5}$ | $1.30 \times 10^{-5}$ | $5.77 \times 10^{-6}$ |
| 100°C <sup>b</sup> | $0.87 \times 10^{-4}$ | $6.50 \times 10^{-5}$ | $5.47 \times 10^{-5}$ | $4.00 \times 10^{-5}$ |

<sup>a</sup> Relative humidity <sup>b</sup> Temperature.

Table S2 The  $\sigma$  values ( $\text{S}\cdot\text{cm}^{-1}$ ) of 2 under various RHs and temperatures

|                    | 98%RH <sup>a</sup>    | 93%RH <sup>a</sup>    | 85%RH <sup>a</sup>    | 75%RH <sup>a</sup>    | 68RH% <sup>a</sup>    |
|--------------------|-----------------------|-----------------------|-----------------------|-----------------------|-----------------------|
| 30°C <sup>b</sup>  | $1.73 \times 10^{-7}$ | -                     | -                     | -                     | -                     |
| 40°C <sup>b</sup>  | $5.00 \times 10^{-7}$ | $3.46 \times 10^{-8}$ | -                     | -                     | -                     |
| 50°C <sup>b</sup>  | $1.30 \times 10^{-6}$ | $2.60 \times 10^{-8}$ | $4.00 \times 10^{-7}$ | $1.40 \times 10^{-7}$ | -                     |
| 60°C <sup>b</sup>  | $5.20 \times 10^{-6}$ | $2.60 \times 10^{-7}$ | $8.66 \times 10^{-7}$ | $1.92 \times 10^{-7}$ | $1.73 \times 10^{-7}$ |
| 70°C <sup>b</sup>  | $1.44 \times 10^{-5}$ | $8.66 \times 10^{-7}$ | $2.26 \times 10^{-6}$ | $2.55 \times 10^{-7}$ | $2.23 \times 10^{-7}$ |
| 80°C <sup>b</sup>  | $7.42 \times 10^{-5}$ | $2.60 \times 10^{-5}$ | $8.66 \times 10^{-6}$ | $2.29 \times 10^{-6}$ | $4.59 \times 10^{-7}$ |
| 90°C <sup>b</sup>  | $1.30 \times 10^{-4}$ | $8.66 \times 10^{-5}$ | $5.20 \times 10^{-5}$ | $9.43 \times 10^{-6}$ | $6.87 \times 10^{-7}$ |
| 100°C <sup>b</sup> | $1.58 \times 10^{-4}$ | $1.01 \times 10^{-4}$ | $1.03 \times 10^{-4}$ | $1.94 \times 10^{-5}$ | $9.69 \times 10^{-6}$ |

<sup>a</sup> Relative humidity <sup>b</sup> Temperature.
